# Supplementary material
Source: PubMed Central journal article supplement (PMC3949636)
Supplement: cei0173-0480-sd1.pdf [file cei0173-0480-sd1.pdf]

PBMC singly stained with the following:

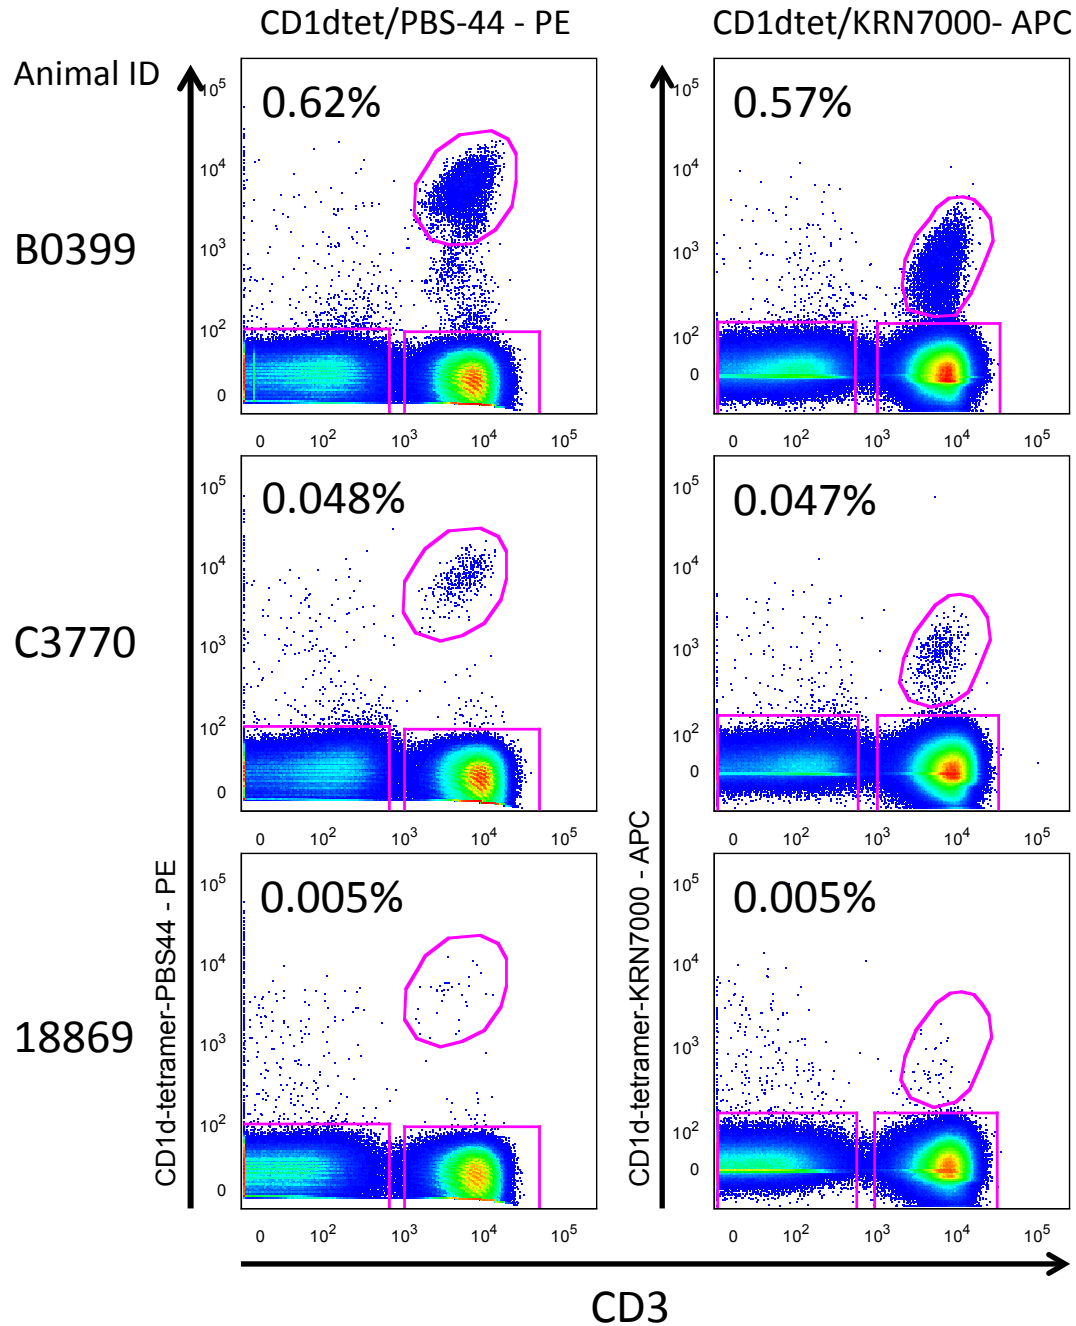

Supplementary Figure 1.  
Equivalent staining of pigtail macaque PBMC with CD1d tetramers loaded with either PBS-44 or KRN7000.  
Frozen PBMC from three macaques were singly stained with CD3 in combination with either CD1dtetramers loaded PBS-44 conjugated to PE fluorochrome, or CD1dtetramers loaded with KRN7000 conjugated to APC fluorochrome.
